# Supplementary material for: Biomass-burning-derived particles from a wide variety of fuels: Part 2: Effects of photochemical aging on particle optical and chemical properties
Source: Copernicus journal article supplement (doi:10.5194/acp-2020-137), 2020-02-27
Supplement: Supplementary file 1 [file acp-2020-137-supplement.pdf]

# **Supplemental Material for “Biomass-burning-derived particles from a wide variety of fuels: Part 2: Effects of photochemical aging on particle optical and chemical properties”**

Christopher D. Cappa<sup>1,2,\*</sup>, Christopher Y. Lim<sup>3</sup>, David H. Hagan<sup>3</sup>, Matthew Coggon<sup>4,5,7</sup>, Abigail Koss<sup>4,5^</sup>, Kanako Sekimoto<sup>4,5,6</sup>, Joost de Gouw<sup>5,7</sup>, Timothy B. Onasch<sup>8</sup>, Carsten Warneke<sup>4,5</sup> Jesse H. Kroll<sup>3</sup>

<sup>1</sup> Department of Civil and Environmental Engineering, University of California, Davis, CA, USA 95616

<sup>2</sup> Atmospheric Sciences Graduate Group, University of California, Davis, CA, USA 95616

<sup>3</sup> Department of Civil and Environmental Engineering, Massachusetts Institute of Technology, Cambridge, MA, USA

<sup>4</sup> NOAA Earth System Research Laboratory (ESRL), Chemical Sciences Division, Boulder, CO 80305, USA

<sup>5</sup> Cooperative Institute for Research in Environmental Sciences, University of Colorado Boulder, Boulder, CO 80309, USA

<sup>6</sup> Graduate School of Nanobioscience, Yokohama City University, Yokohama, Kanagawa 236-0027, Japan

<sup>7</sup> Department of Chemistry, University of Colorado Boulder, Boulder, CO 80302, USA

<sup>8</sup> Aerodyne Research, Billerica, MA 01821, USA

<sup>^</sup> Now at Department of Civil and Environmental Engineering, Massachusetts Institute of Technology, Cambridge, MA, USA

\* To whom correspondence should be addressed: [cdcappa@ucdavis.edu](mailto:cdcappa@ucdavis.edu)

## 1 Supplementary Material

### 1.1 Model parameter cross-sensitivities and uncertainties

The SOA yields are most sensitive to the initial [NMOG]/[OA] ratio. When the [NMOG]/[OA] ratio is assumed larger, the necessary SOA yields are smaller. There is an approximately inverse relationship between the assumed initial [NMOG] and the SOA yield for each NMOG type (fast, slow, very slow). However, the influence of multi-generational impacts the relationship to some extent.

The O:C ratios for the different SOA types are weakly dependent on the relative abundances specified for the different types. There is also a weak cross-sensitivity between the O:C values specified for the different SOA types, especially between the fast and slow-forming SOA. In general, if the  $O:C_{fast}$  is increased, the  $O:C_{slow}$  must be decreased. However, only relatively minor variations in the O:C of each type is allowable to obtain reasonable model-measurement agreement, especially at short photochemical ages. The  $f_{60}$  values for the different SOA types exhibit similar cross-sensitivities as the O:C values. However, they are generally less sensitive, in comparison, because the  $f_{60}$  values are so similar for all SOA types.

The model  $k_{OH}$  values also exhibit some dependence on the assumed initial [NMOG]/[OA] and yields. In general, if  $k_{OH,fast}$  is decreased the  $k_{OH,slow}$  must be increased. However, the  $k_{OH,fast}$  is reasonably well-constrained by the rapid rise in the [OA]/[rBC] and O:C for all particle classes, and by the increase in the  $MAC_{BrC,405nm}$  that is observed at very short photochemical ages for some of the particle classes. The assumed  $k_{OH}$  for multi-generational aging is most sensitive to the choice of the  $k_{OH,slow}$ , with the two generally exhibiting an inverse relationship.

It is difficult to estimate a comprehensive uncertainty on these values; we qualitatively estimate uncertainties based on the model sensitivity to changing these parameter values. If the  $MAC_{fast}$  were as small as the values for the other SOA types the modeled  $MAC_{BrC}$  would decline much too rapidly compared to the observations. Also, it is necessary that the  $MAC_{fast}$  be greater than the  $MAC_{BrC}$  of the primary OA for SSA class 5 and class 6 to reproduce the initial increase at short aging times. However, if the  $MAC_{fast}$  were much larger than our estimate the model predicts an initial increase in the  $MAC_{BrC}$  for the intermediate SSA classes 3 and 4, in contrast to the observations. We therefore estimate a uncertainty of  $\pm 0.2 \text{ m}^2 \text{ g}^{-1}$  based on the model sensitivity to

variations in this parameter. The  $MAC_{\text{slow}}$  values are largely determined by the behavior at intermediate equivalent ages, as this is where they have the largest fractional contributions; we estimate the uncertainty as  $\pm 0.05 \text{ m}^2 \text{ g}^{-1}$ . The  $MAC_{\text{vs}}$  is not especially well-constrained as it only makes up a very small fraction of the OA mass. A value of  $MAC_{\text{vs}} = 0.05 \text{ m}^2 \text{ s}^{-1}$  is used for consistency with the  $MAC_{\text{slow}}$ , but a value of  $MAC_{\text{vs}} = 0 \text{ m}^2 \text{ g}^{-1}$ , i.e. non-absorbing, is not entirely unreasonable. The  $MAC_{2\text{G}}$  and  $MAC_{\text{het}}$  values are primarily determined by the behavior at long equivalent ages. The estimated uncertainty in  $MAC_{2\text{G}}$  is  $\pm 0.05 \text{ m}^2 \text{ g}^{-1}$  while the estimated uncertainty in  $MAC_{\text{het}}$  is  $\pm 0.025 \text{ m}^2 \text{ g}^{-1}$ . That the  $MAC_{\text{het}}$  is smaller than the  $MAC_{\text{BrC}}$  values for the various SOA types indicates that over longer time the overall  $MAC_{\text{BrC}}$  will continue to decline until it reaches  $0.05 \text{ m}^2 \text{ g}^{-1}$ .

## 1.2 Supplemental Figures

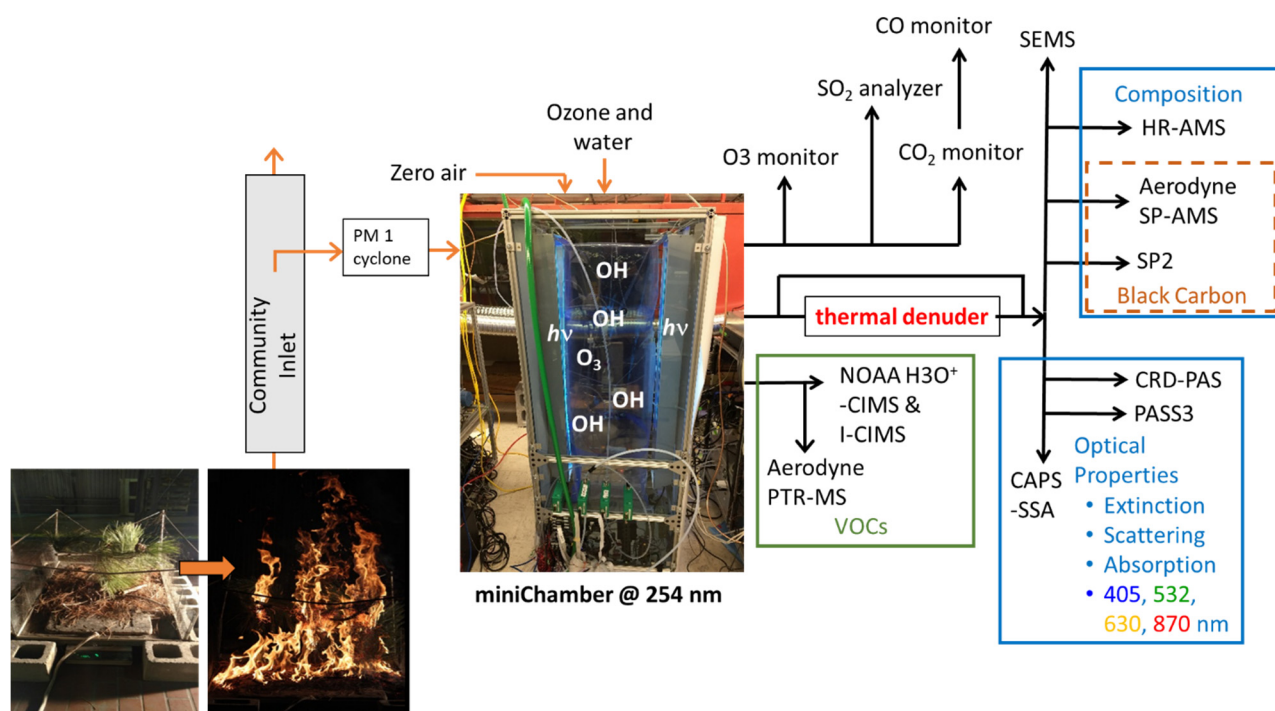

**Figure S1.** Cartoon schematic of sampling into and from the mini chamber during FIREX. Instrument names are given in

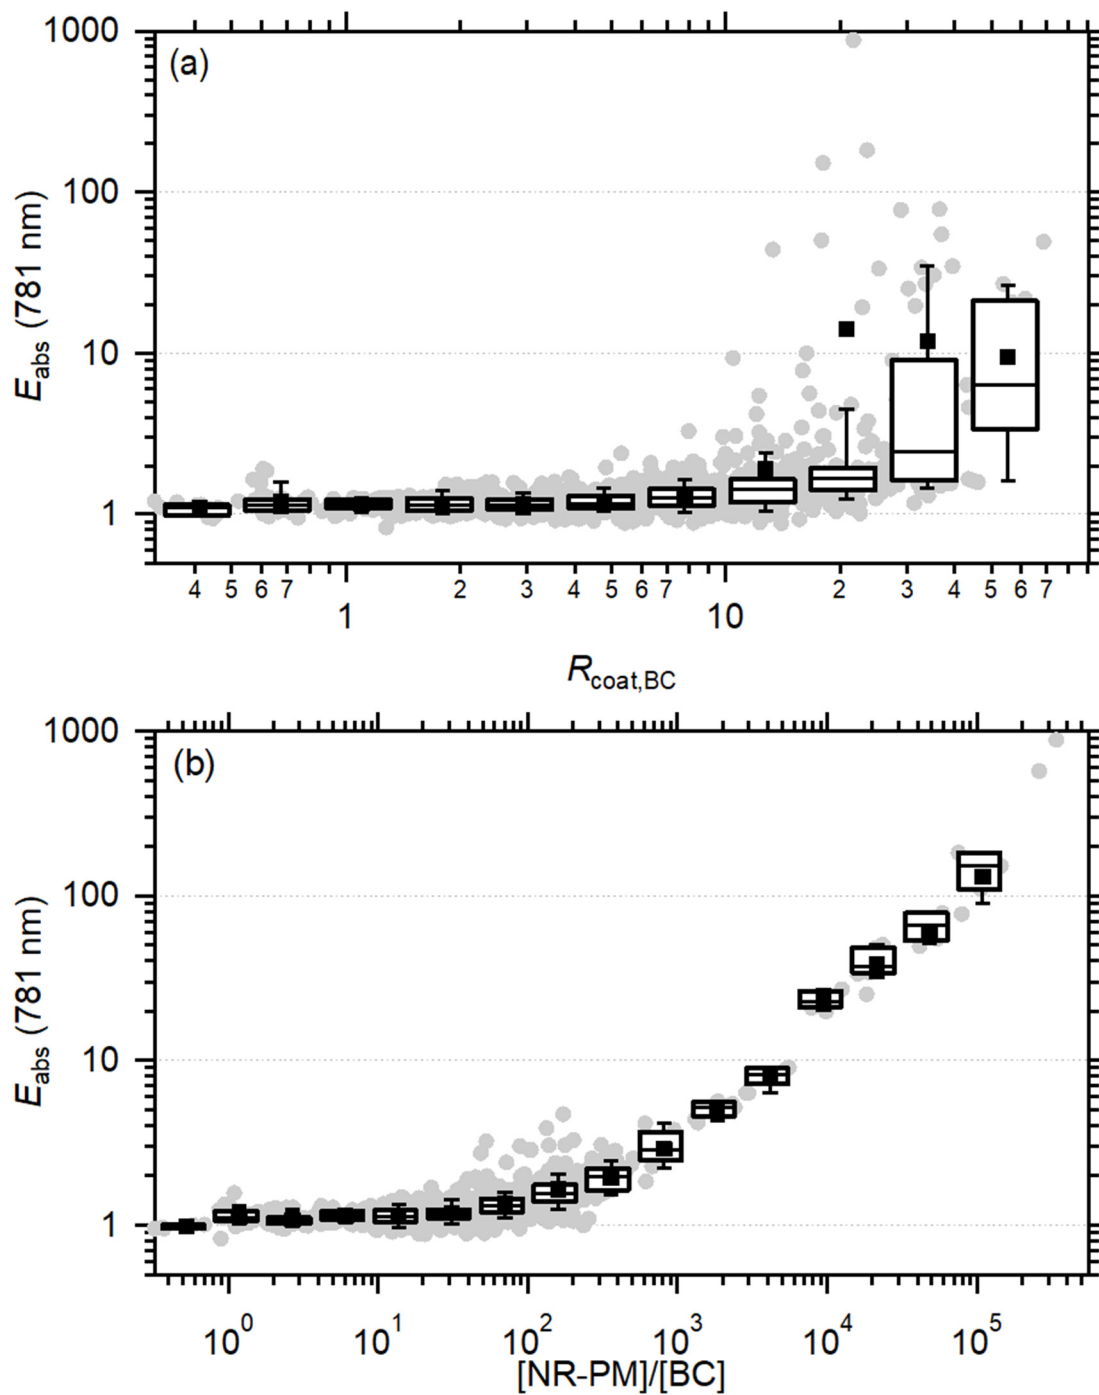

**Figure S2.** (a) Dependence of the observed  $E_{\text{abs}}$  781 nm on the coating-to-rBC core mass ratio,  $R_{\text{coat-rBC}}$ . (b) Dependence of the  $E_{\text{abs}}$  at 781 nm on the [NR-PM]/[rBC] ratio. The observations have been binned according to either the  $R_{\text{coat-rBC}}$  or [NR-PM]/[rBC] ratio, shown as box-and-whisker plots.

81  
82

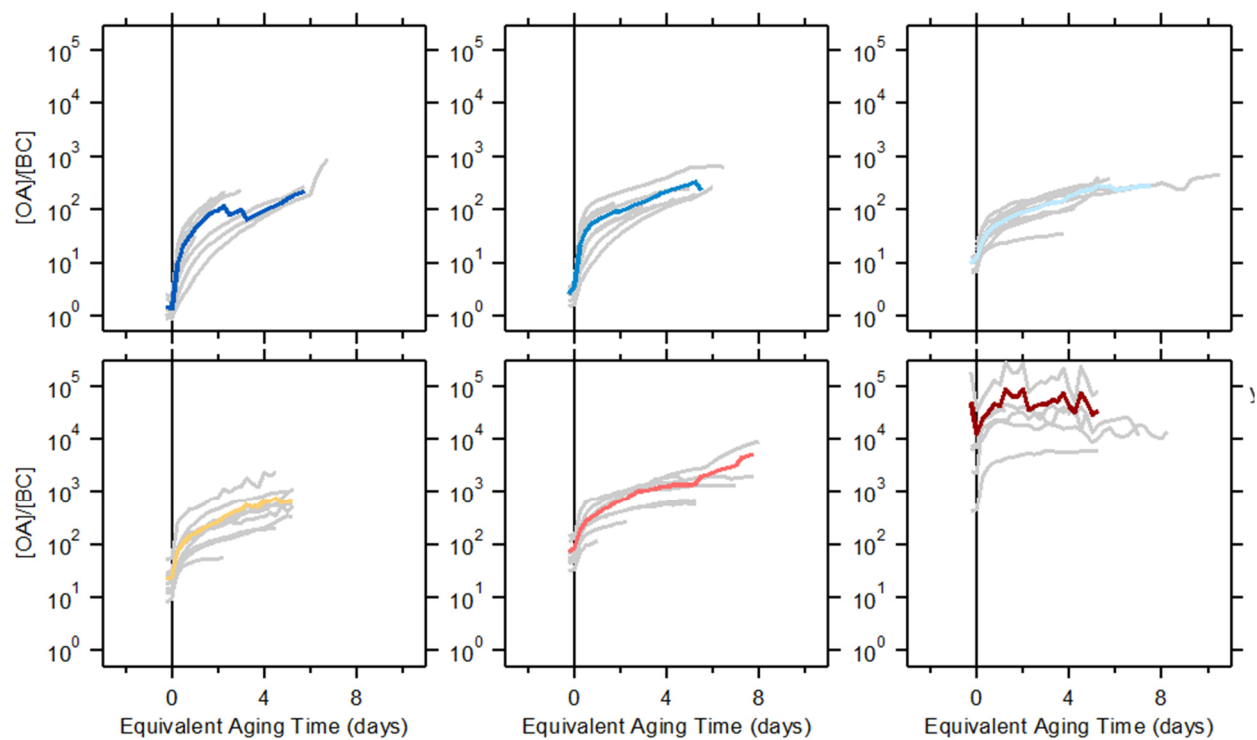

83  
84 **Figure S3.** Relationship between  $[OA]/[BC]$  and the equivalent atmospheric aging time for each  
85 SSA classification. Individual burns are shown as gray lines, and the average for each SSA class  
86 as the colored line.  
87

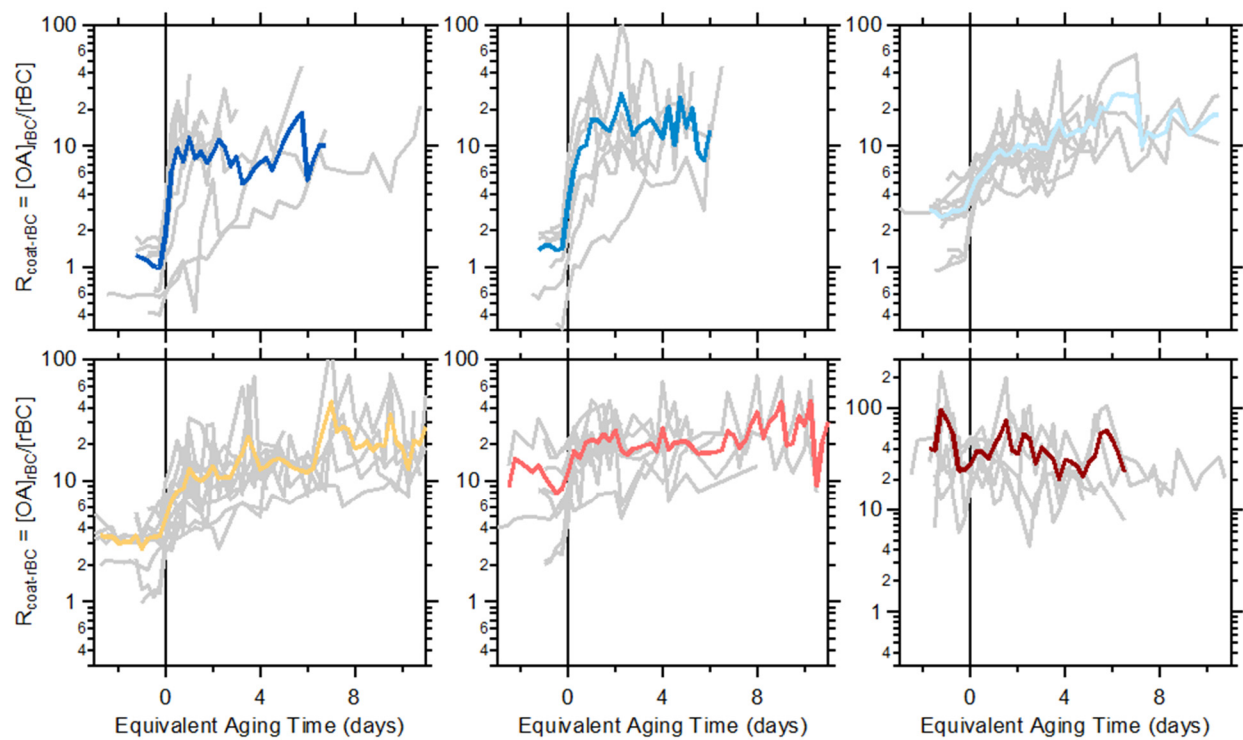

**Figure S4.** Relationship between  $R_{\text{coat-rBC}}$  and the equivalent atmospheric aging time for each SSA classification. Individual burns are shown as gray lines, and the average for each SSA class as the colored line.

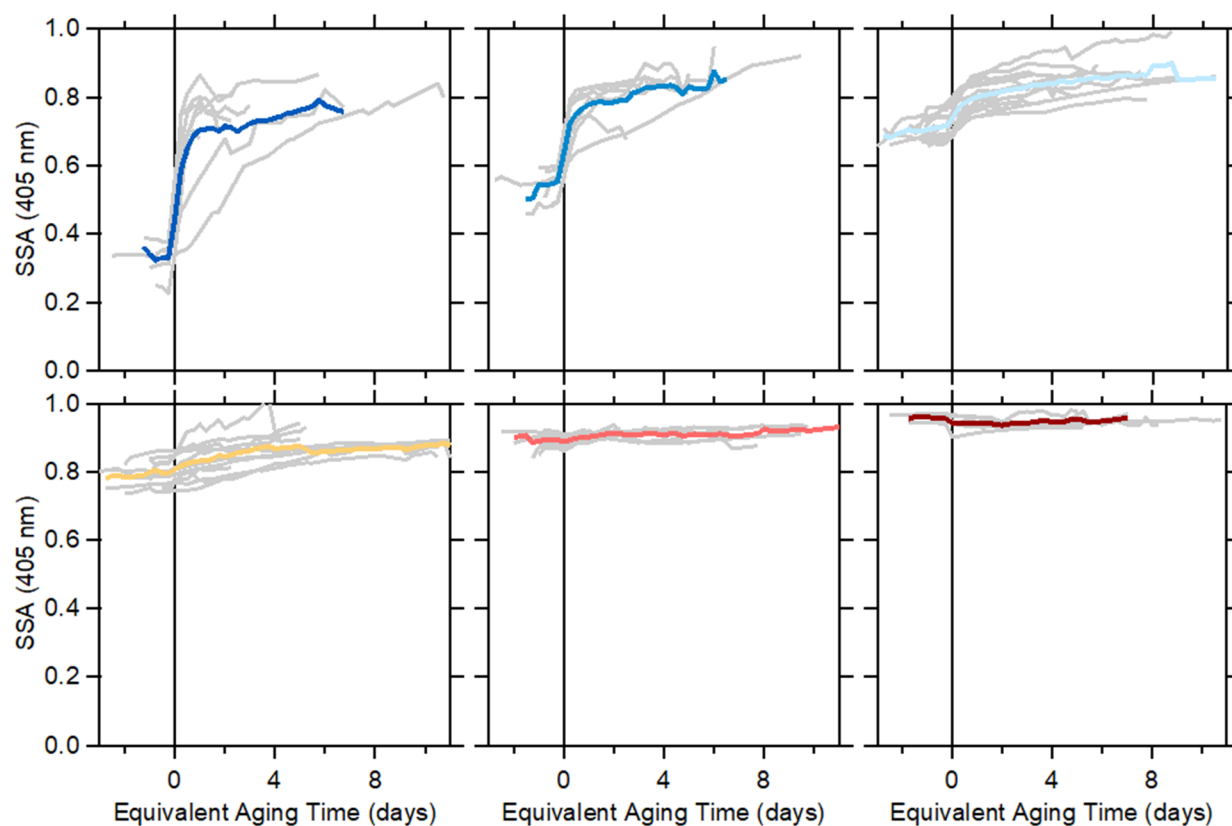

**Figure S5.** Relationship between SSA at 405 nm and the equivalent atmospheric aging time for each SSA classification. Individual burns are shown as gray lines, and the average for each SSA class as the colored line.



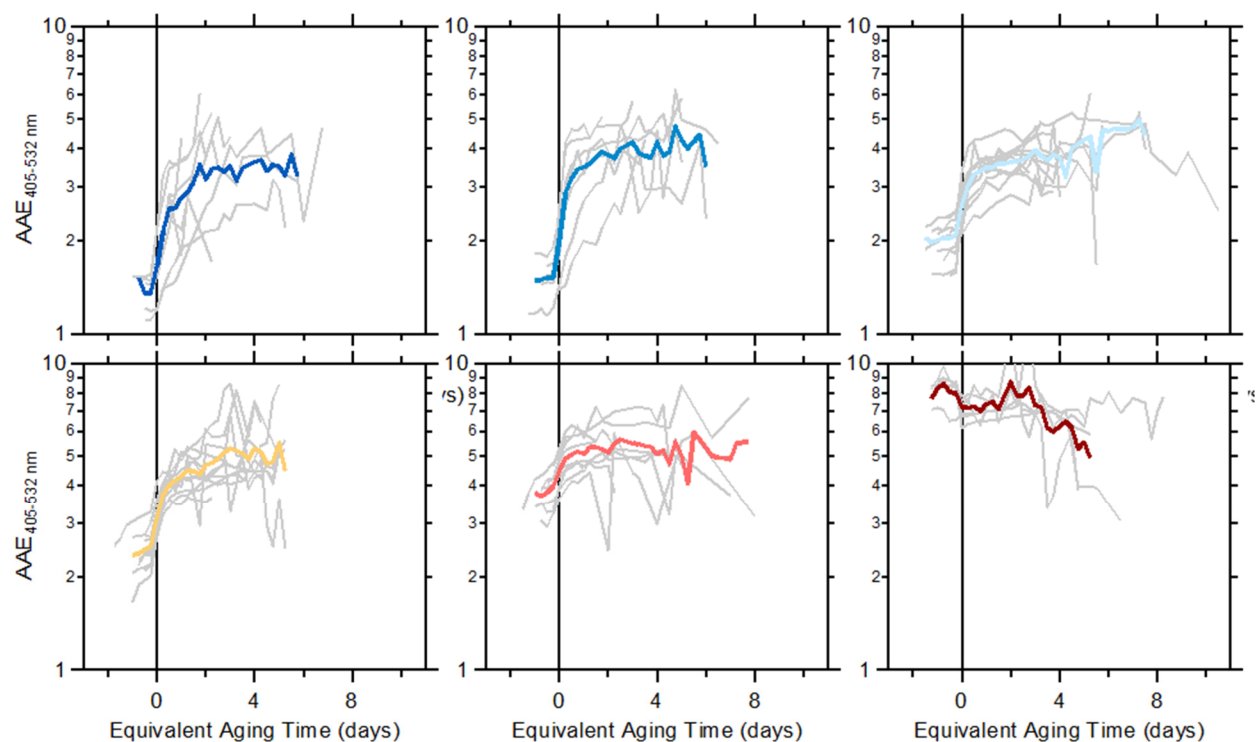

**Figure S6.** Relationship between the  $AAE_{405-532}$  and the equivalent atmospheric aging time for each SSA classification. Individual burns are shown as gray lines, and the average for each SSA class as the colored line.

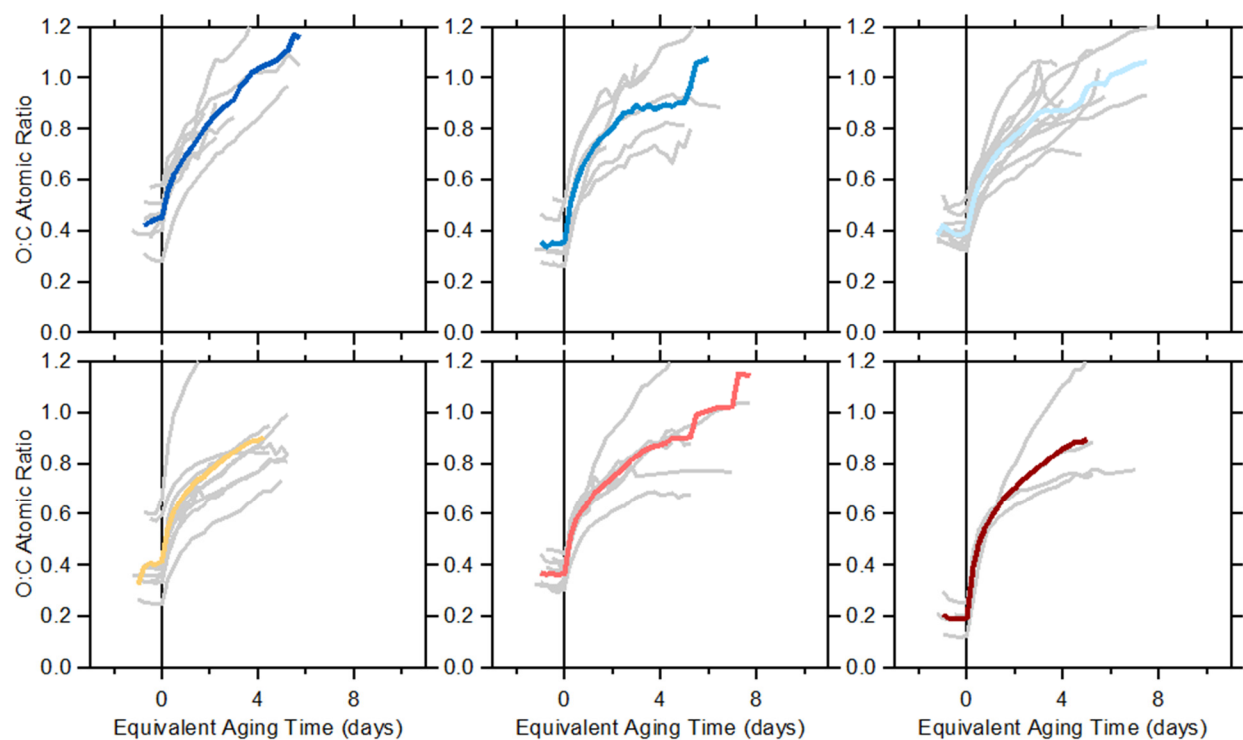

**Figure S7.** Relationship between the O:C atomic ratio at 405 nm and the equivalent atmospheric aging time for each SSA classification. Individual burns are shown as gray lines, and the average for each SSA class as the colored line.

113

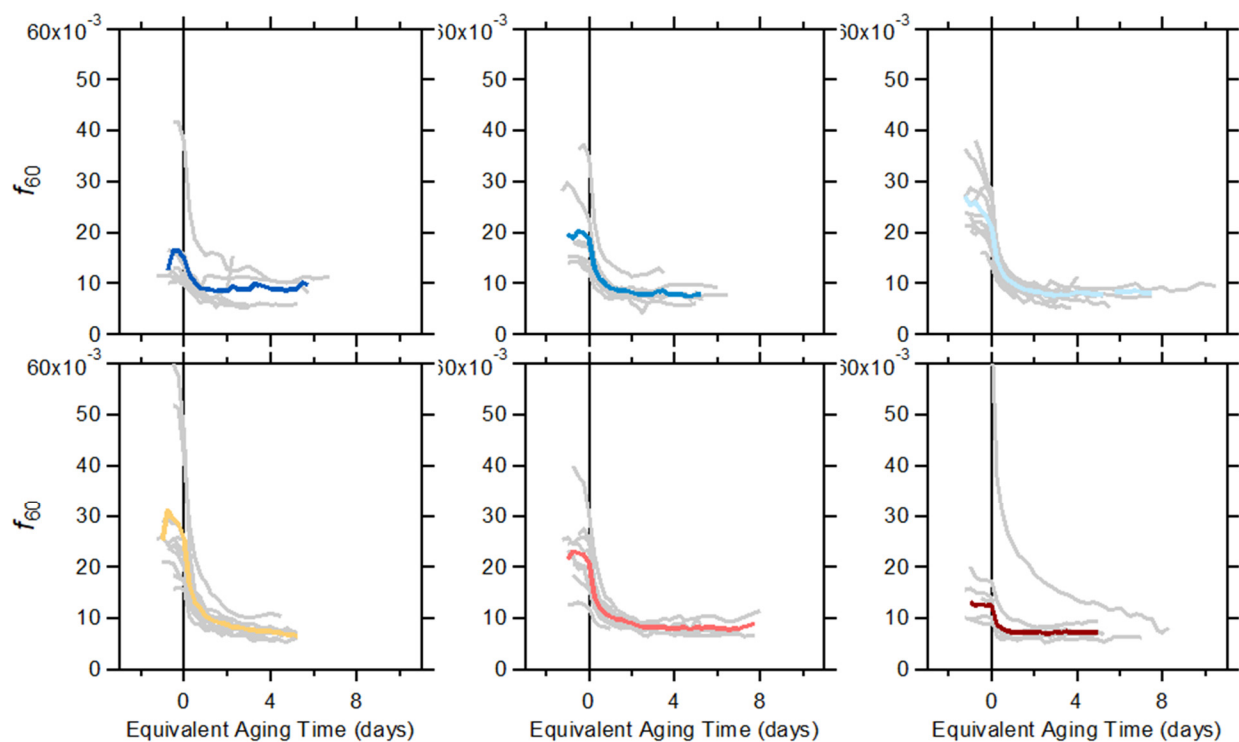

114

115

116

117

118

**Figure S8.** Relationship between the AMS  $f_{60}$  and the equivalent atmospheric aging time for each SSA classification. Individual burns are shown as gray lines, and the average for each SSA class as the colored line.

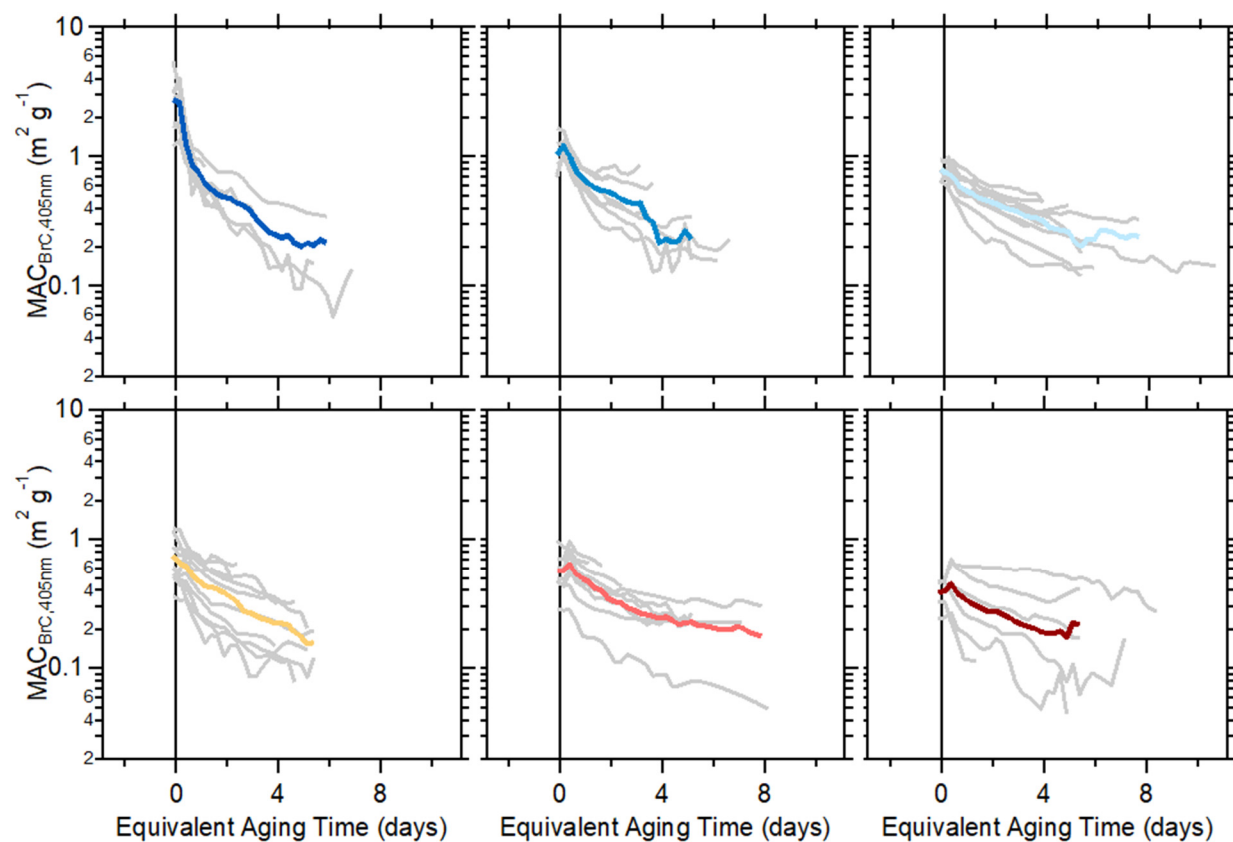

**Figure S9.** Relationship between the  $MAC_{BrC}$  at 405 nm and the equivalent atmospheric aging time for each SSA classification. Individual burns are shown as gray lines, and the average for each SSA class as the colored line.

125

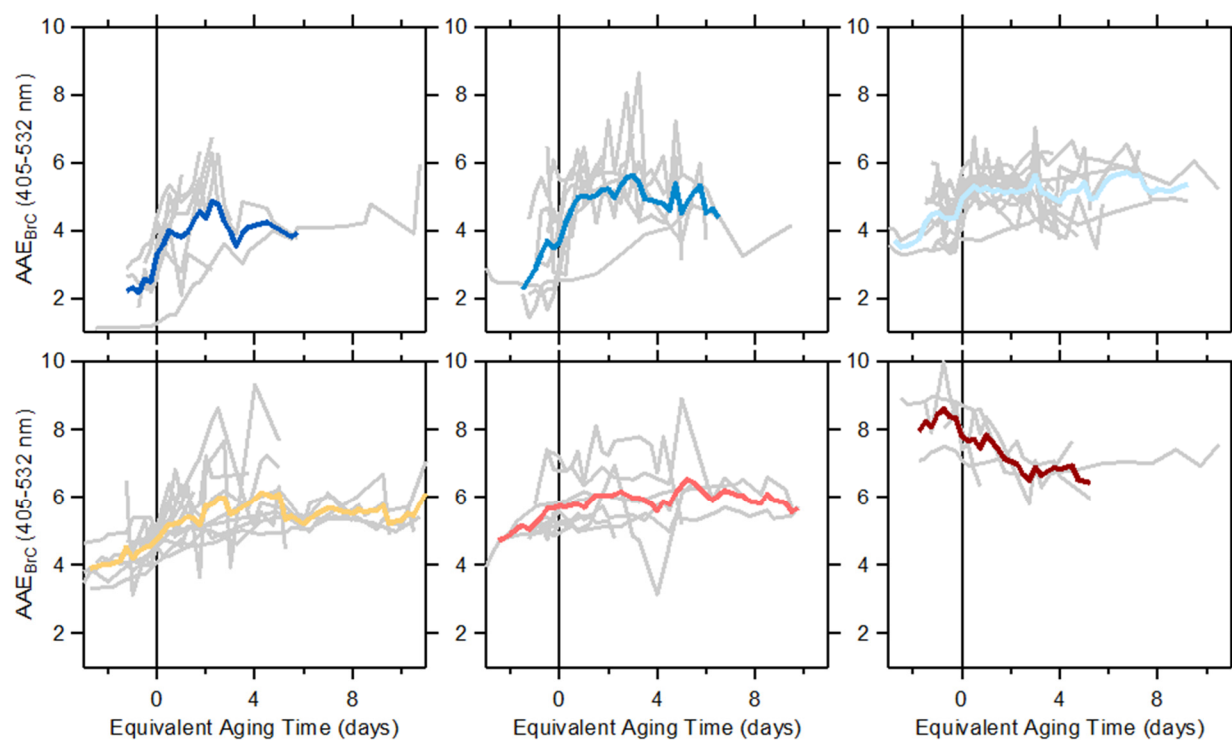

126

127

128

129

130

131

**Figure S10.** Relationship between the AAE<sub>BrC</sub> for the 405-532 nm pair and the equivalent atmospheric aging time for each SSA classification. Individual burns are shown as gray lines, and the average for each SSA class as the colored line. Top row, left-to-right: class 1-3. Bottom row, left-to-right: class 4-6.

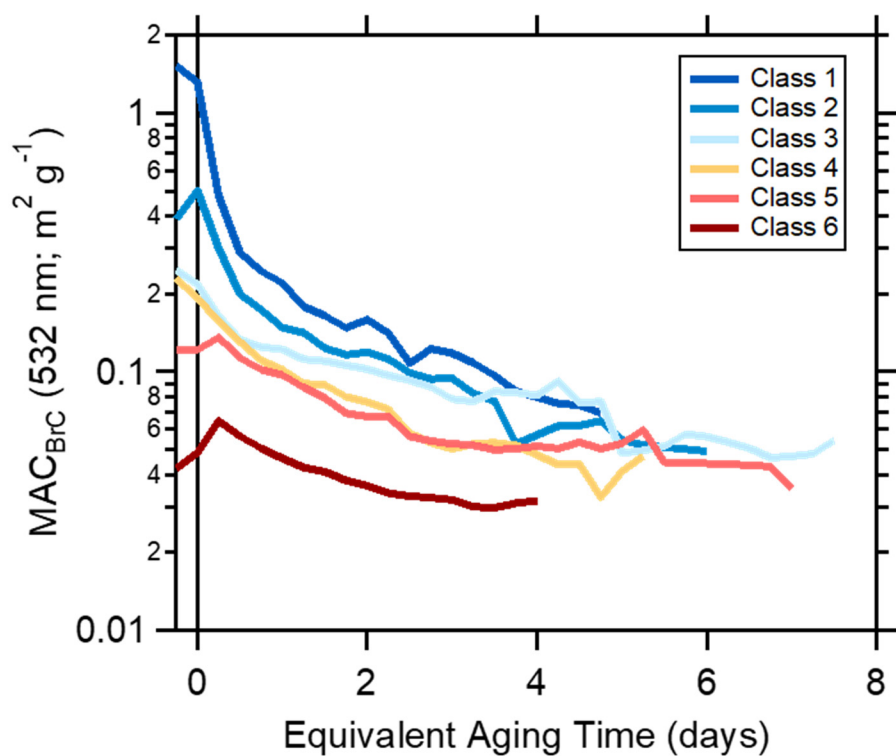

**Figure S11.** Influence of photochemical aging on  $MAC_{BrC}$  at 532 nm. The equivalent aging time assumes  $[OH] = 1.5 \times 10^6$  molecules/cm<sup>3</sup>. The averages for each SSA classification are shown.

137  
138

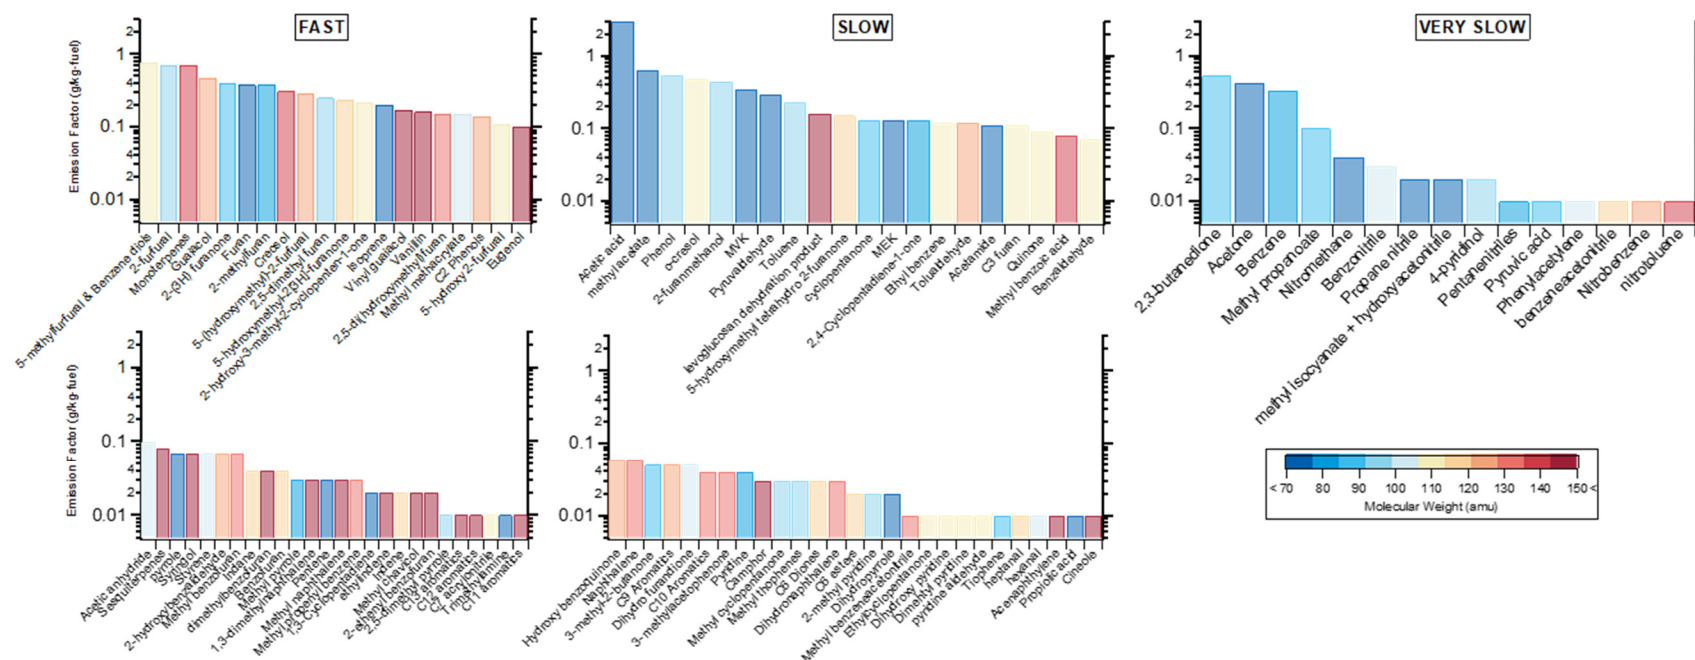

139  
140 **Figure S12.** NMOG having MW > 50 amu, grouped into fast reacting, slow reacting and very slow reacting species. For each group,  
141 the NMOG are shown ordered according to the overall average emission factors, and are colored by their MW. Data are from Koss et  
142 al. (2018).

143

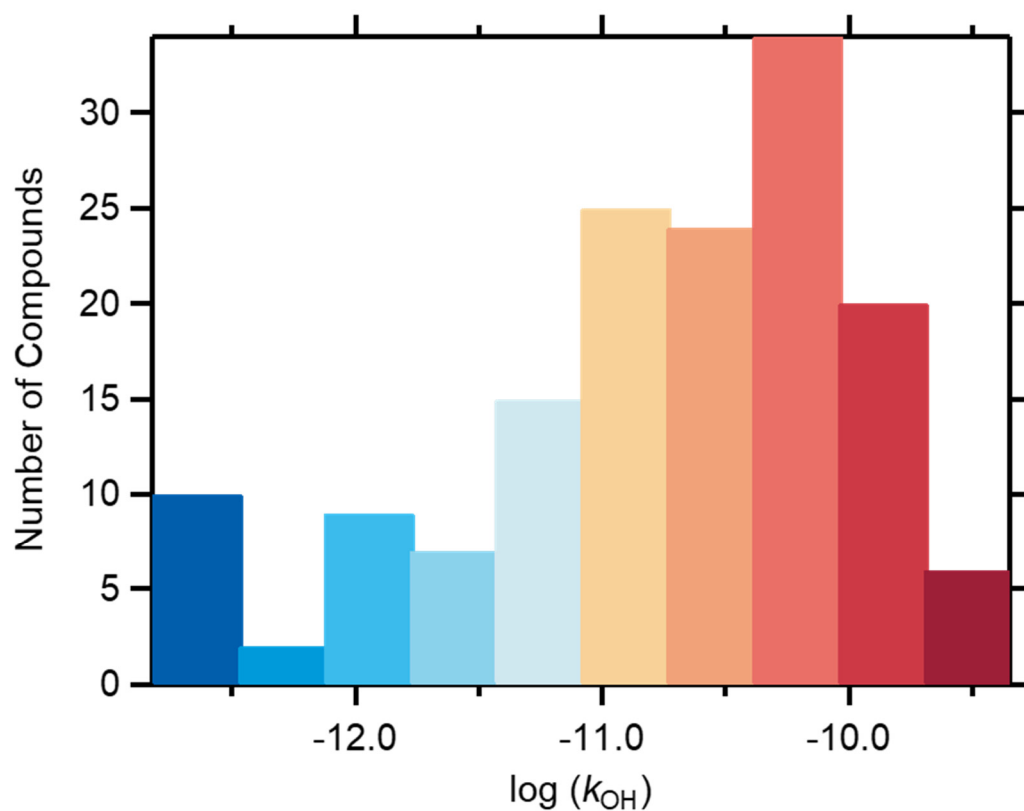

144  
145  
146  
147  
148

**Figure S13.** Histogram of rate coefficients for the NMOG having  $MW > 50$  amu, as measured by Koss et al. (2018).



149  
150

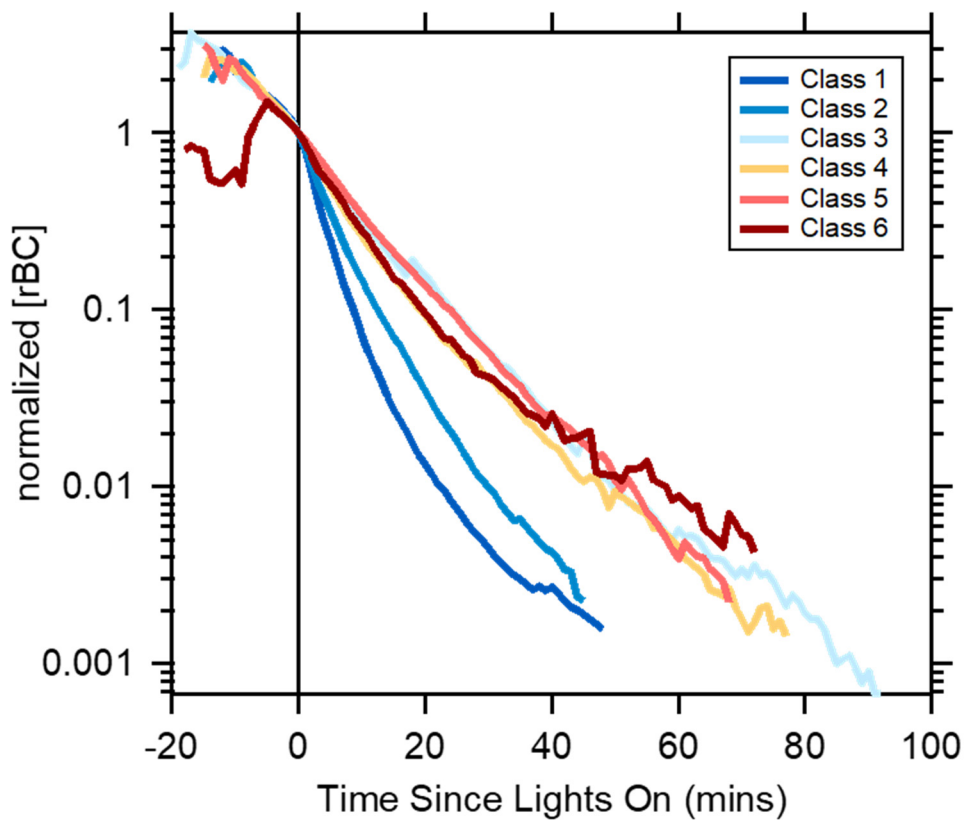

151  
152 **Figure S14.** Normalized rBC concentration as a function of experiment time, averaged for each  
153 SSA classification. Results for each experiment are shown in **Figure S15**.  
154

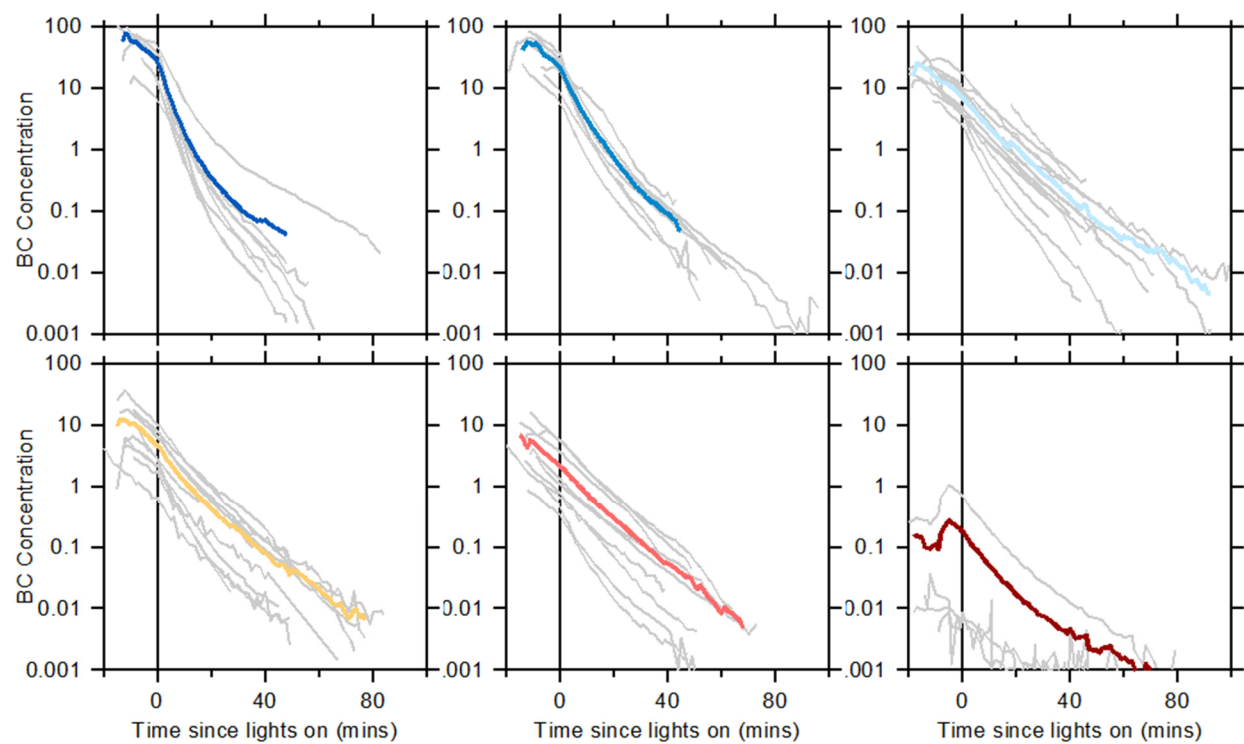

**Figure S15.** Normalized rBC concentration as a function of experiment time, with individual experiments shown as gray lines and the averages for each SSA classification as colored lines.

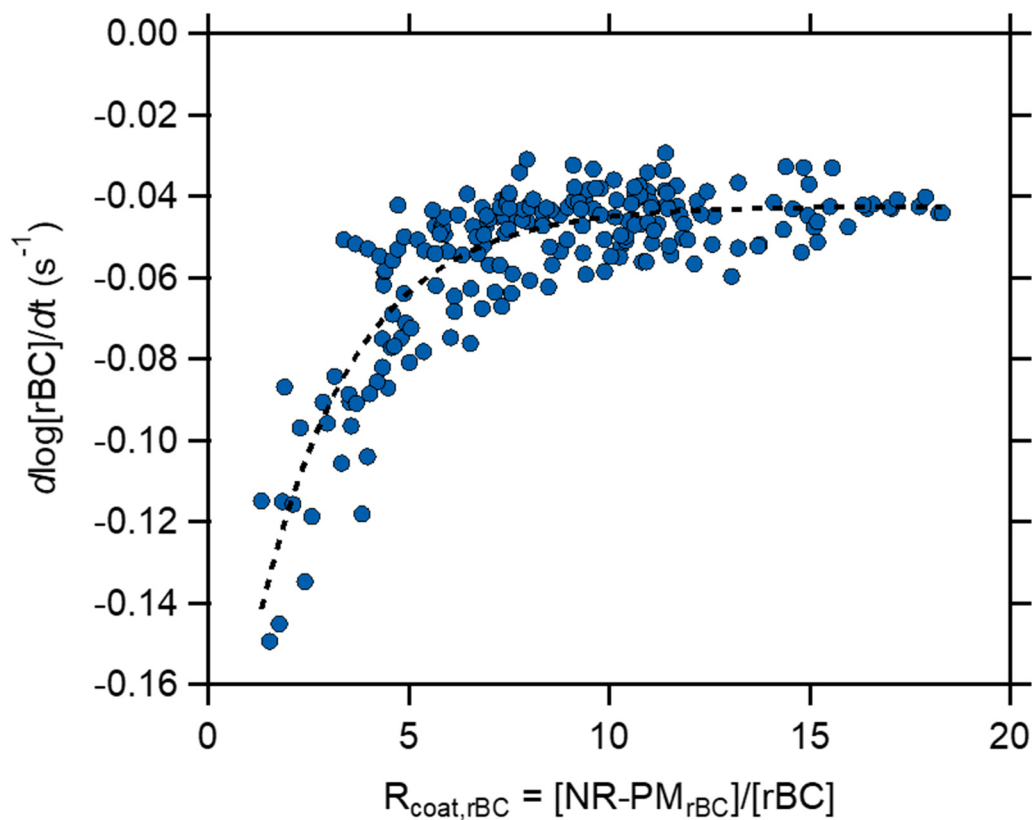

**Figure S16.** Observed loss rate of refractory BC as a function of the coating-to-core mass ratio. The data are fit using an exponential function, with  $-d\log[rBC]/dt = -0.0424 - 0.172 \exp(-0.419 \cdot R_{\text{coat},rBC})$ .

166  
167

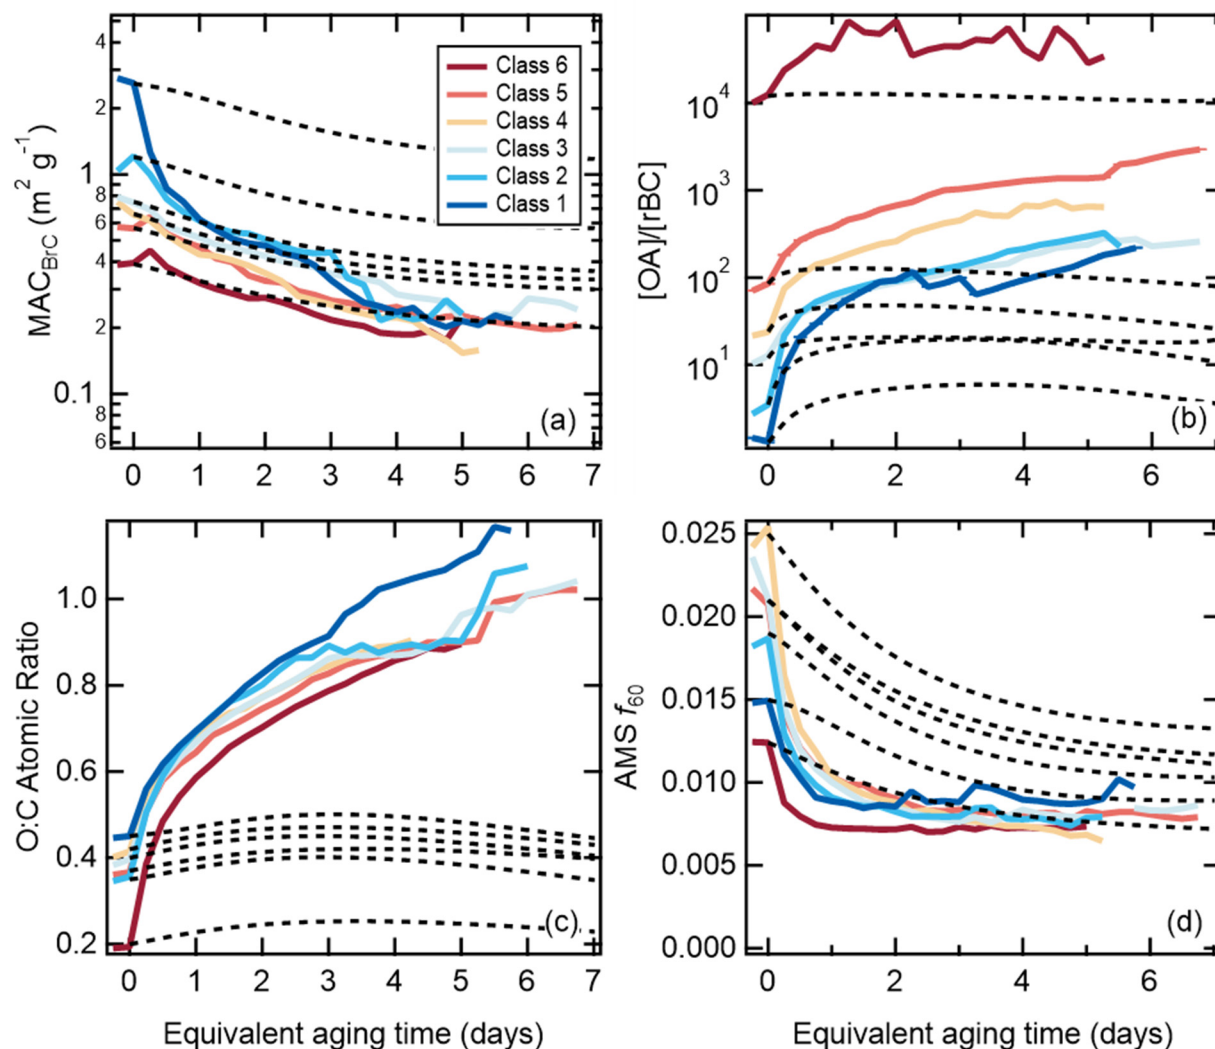

168  
169 **Figure S17.** Comparison between observations (solid lines) and model results when only  
170 heterogeneous oxidation is included, i.e. no SOA (dashed lines). Results shown for values of the  
171 (a)  $MAC_{BrC}$ , (b) the  $[OA]/[rBC]$  ratio, (c) the O:C atomic ratio, and (d) the AMS  $f_{60}$  versus  
172 equivalent photochemical aging time (assuming  $[OH] = 1.5 \times 10^6 \text{ molecules cm}^{-3}$ ), with results  
173 shown for each SSA class. The increase in the modeled  $[OA]/[rBC]$ , despite there being no SOA  
174 formation in this model formulation, results from faster loss of OA that is internally mixed with  
175 rBC compared with the OA that is externally mixed.

176  
177  
178

179  
180

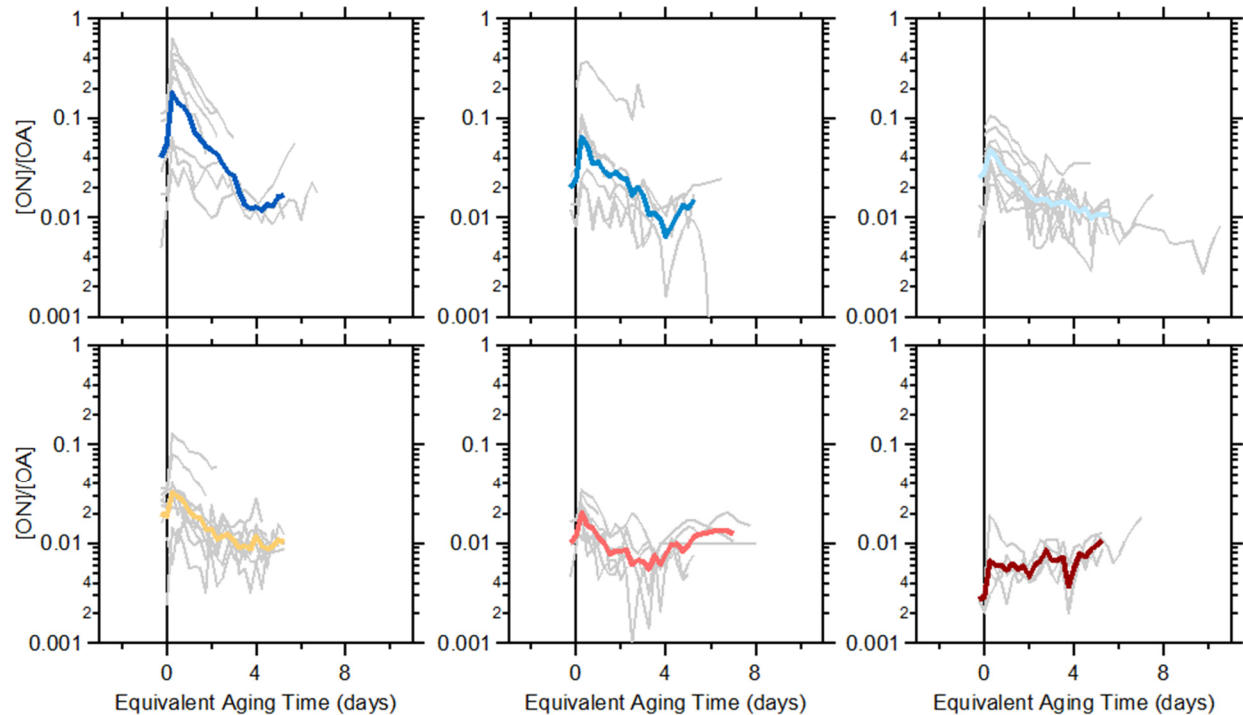

181  
182 **Figure S18.** Dependence of the organic nitrate-to-total OA ratio on equivalent aging time for the  
183 different SSA classes. Individual burns are shown as gray lines, and the average for each SSA  
184 class as the colored line. Top row, left-to-right: class 1-3. Bottom row, left-to-right: class 4-6.

185  
186

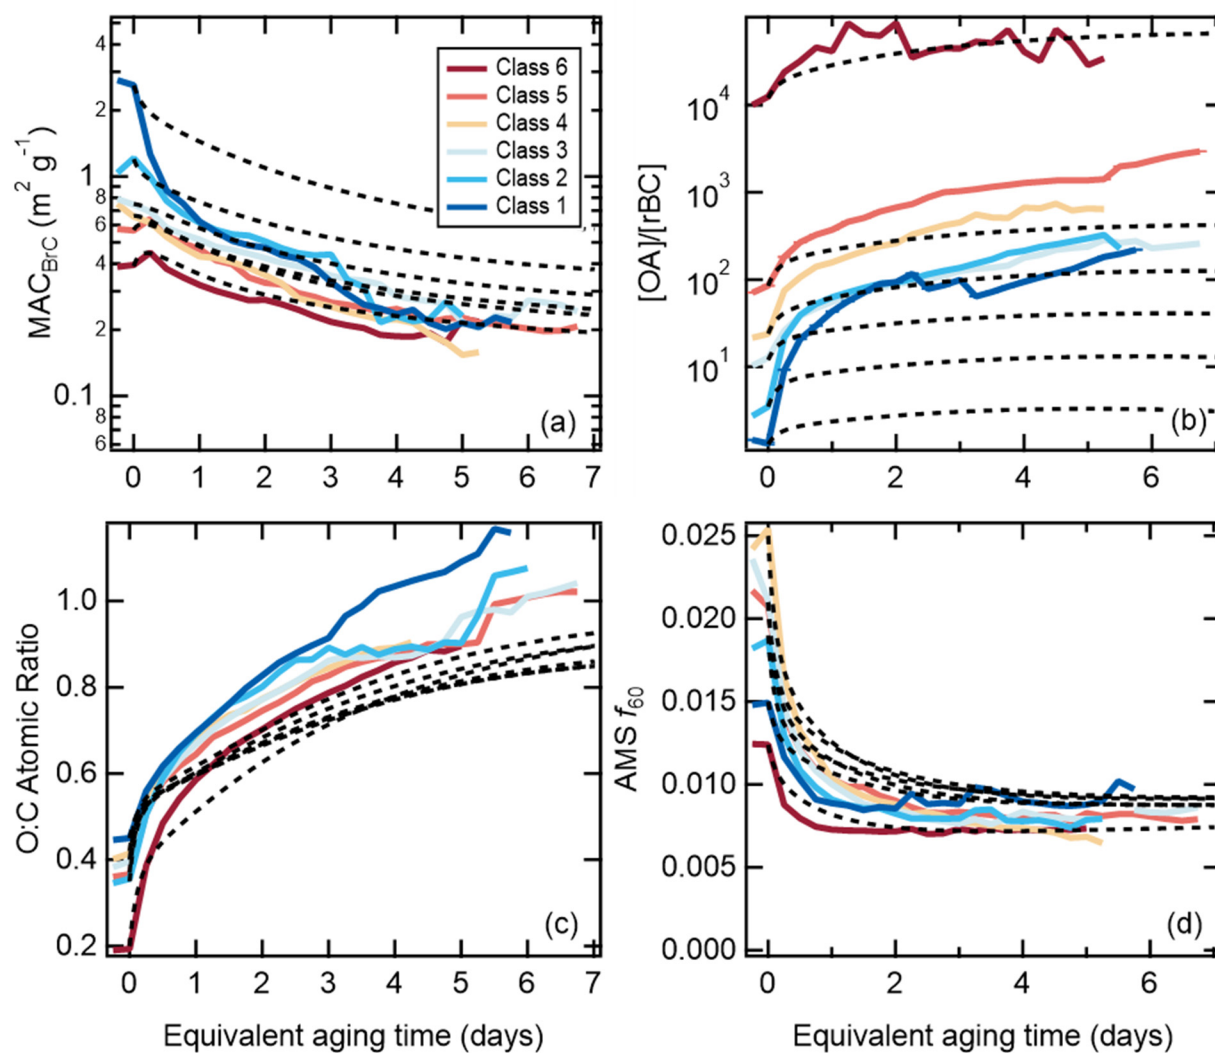

187  
188 **Figure S19.** Same as **Error! Reference source not found.**, but where dilution is turned off  
189 entirely for both gases and particles. This corresponds to an “atmospheric” simulation.  
190

### 1.3 Supplemental Tables

**Table S1.** Fuel types used.

| <b>Fuel Types*</b>                  |                               |
|-------------------------------------|-------------------------------|
| bear grass                          | lodgepole pine, mixed         |
| ceanothus                           | lodgepole pine,<br>canopy     |
| chaparral (chamise), canopy         | lodgepole pine, litter        |
| chaparral (manzanita), canopy       | Peat, Kalimantan              |
| Douglas fir, mixed                  | ponderosa pine,<br>mixed      |
| Douglas fir, canopy                 | ponderosa pine,<br>canopy     |
| Douglas fir, litter                 | ponderosa pine, litter        |
| Douglas fir, rotten log             | ponderosa pine, rotten<br>log |
| Engelmann spruce, mixed             | rice straw                    |
| Engelmann spruce, canopy            | sagebrush                     |
| Engelmann spruce, duff              | subalpine fir, mixed          |
| Engelmann spruce, Fish Lake, canopy | subalpine fir, canopy         |
| Excelsior                           | subalpine fir, duff           |
| Excelsior (poplar)                  | subalpine fir, litter         |
| jeffrey pine, duff                  | subalpine fir                 |
| juniper, canopy                     | untreated lumber              |
| loblolly pine, litter               | yak dung                      |

\*Further details on each fuel type, including the particular mix for mixed-type burns, elemental composition, and moisture content are available on the NOAA FIREX project website at

**Table S2.** Instruments sampling from the mini chamber.

| Instrument       | Property Measured                                                              |
|------------------|--------------------------------------------------------------------------------|
| <i>Particles</i> |                                                                                |
| UCD CRD-PAS      | Light absorption and dry/humidified light extinction at 405 nm and 532 nm      |
| PASS-3           | Light absorption and scattering at 781 nm                                      |
| CAPS-SSA         | Light extinction and scattering at 630 nm                                      |
| HR-ToF-AMS       | Bulk particle non-refractory composition and concentration for PM <sub>1</sub> |
| SP-AMS           | rBC-containing particle composition and concentration for PM <sub>1</sub>      |
| SP2              | rBC concentrations and size distributions                                      |
| SEMS             | Mobility size distributions (10-1200 nm)                                       |
| <i>Gases</i>     |                                                                                |
| Ozone monitor    | O <sub>3</sub> concentrations                                                  |
| PTR-ToF-MS       | Select non-methane organic gases                                               |
| I-CIMS           | Select non-methane organic gases (not used here)                               |
| CO <sub>2</sub>  | CO <sub>2</sub> concentrations                                                 |
| RH probe         | Relative humidity                                                              |

**Table S3.** Fuels by particle Class.

| Class   | Fuel                                                            | SSA range | Log([OA]/[BC]) range |
|---------|-----------------------------------------------------------------|-----------|----------------------|
| Class 1 | Chaparral, canopy, litter (pine), building materials, excelsior | 0.23-0.43 | -0.52 – 0.38         |
| Class 2 | Manzanita, Sage, litter (fir)                                   | 0.43-0.60 | 0.18 – 0.61          |
| Class 3 | Pine, fir, litter, canopy, juniper                              | 0.60-0.74 | 0.82 – 1.3           |
| Class 4 | Pine, fir, canopy, rotten log, ceonothos                        | 0.74-0.87 | 0.92 – 1.74          |
| Class 5 | Canopy (pine), rice, bear grass, duff                           | 0.87-0.93 | 1.49 – 2.16          |
| Class 6 | Rotten log, duff, peat, dung                                    | 0.93-1.00 | 2.63 – 2.02          |



**Table S4.** Summary of conditions for literature brown carbon aging experiments.

| Reference                | Aging method/notes                                                                                                                              | Fuel type/burning notes                                                                                              |
|--------------------------|-------------------------------------------------------------------------------------------------------------------------------------------------|----------------------------------------------------------------------------------------------------------------------|
| Martinsson et al. (2015) | Aging of smoke in oxidation flow reactor (potential aerosol mass reactor); $t_{OH} = 8.3$ days                                                  | Birch; Combustion in a natural-draft conventional wood stove; likely class 1 to class 3 particles                    |
| Saleh et al. (2013)      | Photochemical aging of smoke in 7 m <sup>3</sup> chamber for $t_{OH} \sim$ a few hours; aging of pine likely > oak                              | Pocosin pine and oak; combustion at Missoula fire lab; likely class 1 particles                                      |
| Zhong and Jang (2014)    | Photochemical aging of smoke in a 104 m <sup>3</sup> outdoor chamber using natural sunlight; $t_{OH} =$ a few hours; continual characterization | Hickory hardwood; Smoldering combustion; likely class 5                                                              |
| Kumar et al. (2018)      | Photochemical aging of smoke in an 8 m <sup>3</sup> chamber; $t_{OH}$ up to a day; Interpolate their observations to 405 nm                     | Beechwood; combustion in a residential wood stove; likely class 1                                                    |
| Sumlin et al. (2017)     | Heterogeneous OH aging in an oxidation flow reactor (potential aerosol mass reactor); $t_{OH} = 1, 3.5, 4.5$ days                               | Alaskan peak; smoldering; likely class 6                                                                             |
| Wong et al. (2017)       | Photolytic aging (300-400 nm) of water-soluble and water-insoluble (methanol) extracts in a photoreactor; up to 130 h; photolysis of solutions  | Cherry hardwood; Controlled pyrolysis; likely class 6, although measurements of suspended particles not available    |
| Lee et al. (2014)        | Photolytic aging (275-390 nm) of aqueous extracts; photolysis of solutions                                                                      | SOA produced from naphthalene + OH                                                                                   |
| Fleming et al. (2020)    | Photolytic aging (300-400 nm) of particles on filters; absorption by individual chromophores or total particles measured                        | Variety of fuels from FIREX, comprising different species and ecosystem components; range of particle classes likely |

- Fleming, L. T., Lin, P., Roberts, J. M., Selimovic, V., Yokelson, R., Laskin, J., Laskin, A., and Nizkorodov, S. A.: Molecular composition and photochemical lifetimes of brown carbon chromophores in biomass burning organic aerosol, *Atmos. Chem. Phys.*, 20, 1105-1129, <https://doi.org/10.5194/acp-20-1105-2020>, 2020.
- Kumar, N. K., Corbin, J. C., Bruns, E. A., Massabó, D., Slowik, J. G., Drinovec, L., Močnik, G., Prati, P., Vlachou, A., Baltensperger, U., Gysel, M., El-Haddad, I., and Prévôt, A. S. H.: Production of particulate brown carbon during atmospheric aging of wood-burning emissions, *Atmos. Chem. Phys.*, 2018, 17,843-817,861, <https://doi.org/10.5194/acp-18-17843-2018>, 2018.
- Lee, H. J., Aiona, P. K., Laskin, A., Laskin, J., and Nizkorodov, S. A.: Effect of Solar Radiation on the Optical Properties and Molecular Composition of Laboratory Proxies of Atmospheric

220 Brown Carbon, *Environmental Science & Technology*, 48, 10217-10226,  
 221 <https://doi.org/10.1021/es502515r>, 2014.

222 Martinsson, J., Eriksson, A. C., Nielsen, I. E., Malmborg, V. B., Ahlberg, E., Andersen, C.,  
 223 Lindgren, R., Nyström, R., Nordin, E. Z., Brune, W. H., Svenningsson, B., Swietlicki, E.,  
 224 Boman, C., and Pagels, J. H.: Impacts of Combustion Conditions and Photochemical Processing  
 225 on the Light Absorption of Biomass Combustion Aerosol, *Environmental Science &*  
 226 *Technology*, 49, 14663-14671, <https://doi.org/10.1021/acs.est.5b03205>, 2015.

227 Saleh, R., Hennigan, C. J., McMeeking, G. R., Chuang, W. K., Robinson, E. S., Coe, H.,  
 228 Donahue, N. M., and Robinson, A. L.: Absorptivity of brown carbon in fresh and photo-  
 229 chemically aged biomass-burning emissions, *Atmospheric Chemistry and Physics*, 13, 7683-  
 230 7693, <https://doi.org/10.5194/acp-13-7683-2013>, 2013.

231 Sumlin, B. J., Pandey, A., Walker, M. J., Pattison, R. S., Williams, B. J., and Chakrabarty, R. K.:  
 232 Atmospheric Photooxidation Diminishes Light Absorption by Primary Brown Carbon Aerosol  
 233 from Biomass Burning, *Environmental Science & Technology Letters*, 4, 540-545,  
 234 <https://doi.org/10.1021/acs.estlett.7b00393>, 2017.

235 Wong, J. P. S., Nenes, A., and Weber, R. J.: Changes in Light Absorptivity of Molecular Weight  
 236 Separated Brown Carbon Due to Photolytic Aging, *Environmental Science & Technology*, 51,  
 237 8414-8421, <https://doi.org/10.1021/acs.est.7b01739>, 2017.

238 Zhong, M., and Jang, M.: Dynamic light absorption of biomass-burning organic carbon  
 239 photochemically aged under natural sunlight, *Atmospheric Chemistry and Physics*, 14, 1517-  
 240 1525, <https://doi.org/10.5194/acp-14-1517-2014>, 2014.

241
